# Supplementary material for: Diagnostic Performance of Procalcitonin and Presepsin in Sepsis: A Systematic Review and Meta-analysis
Source: Research Square preprint supplement (doi:10.21203/rs.3.rs-6433015/v1), 2025-11-28
Supplement: Supplementary file 1 [file c5e474fa7d05837c13b2dcca.docx]

**Diagnostic Performance of Procalcitonin and Presepsin in Sepsis: A Systematic Review and Meta-analysis**

**Tanakon Chairaj1#, Pajaree Mongkhon2#, Pit Leewongsakorn1, Kritsada Saensongkwae1, Sawitree Nangola3, Somphot Saoin3, Eakkapote Prompunt3, Prawat Chantharit4, Chiraphat Kloypan1***

1 Department of Pathology, School of Medicine, University of Phayao, Phayao, Thailand; tanakon.rx@icloud.com (TC), pitleeu@gmail.com (PL), s.kritsadaa@gmail.com (KS)

2 Division of Social and Administrative Pharmacy, Department of Pharmaceutical Care, School of Pharmaceutical Sciences, University of Phayao, Phayao, Thailand; pajaree.mo@up.ac.th (PM)

3 Department of Medical Technology, School of Allied Health Sciences, University of Phayao, Phayao, Thailand; sawitree.na@up.ac.th (SN), somphot.sa@up.ac.th (SS), eakkapote.pr@up.ac.th (EP)

4 Division of Infectious Diseases, Department of Medicine, Faculty of Medicine Ramathibodi Hospital, Mahidol University, Bangkok, Thailand; prawat.chn@mahidol.ac.th (PC)

# Co-first author

***** Correspondence: chiraphat.kl@up.ac.th; Tel.: +66 65 594 0519

**Supplementary Online**

**Table S1.** The search strategies: PubMed database from inception to June 30, 2025

| **Search number** | **Query** | **Results** |
| --- | --- | --- |
| #1 | sepsis[MeSH Terms] | 151,674 |
| #2 | septicemia* | 245,486 |
| #3 | "bloodstream infection*" | 242,558 |
| #4 | #1 OR #2 OR #3 | 253,702 |
| #5 | presepsin | 578 |
| #6 | sCD14 | 20,730 |
| #7 | procalcitonin | 11,293 |
| #8 | PCT | 21,707 |
| #9 | #5 OR #6 OR #7 OR #8 | 48,071 |
| #10 | diagnostic | 12,349,033 |
| #11 | accuracy | 699,848 |
| #12 | sensitivity | 2,428,664 |
| #13 | specificity | 5,005,921 |
| #14 | #10 OR #11 OR #12 OR #13 | 16,397,586 |
| #15 | #4 AND #9 AND #14 | 4,655 |
| #16 | Limit #15 to Clinical Study, Clinical Trial, Comparative Study, Multicenter Study, Observational Study, Randomized Controlled Trial, Humans, English | 708 |

**Table S2.** The search strategies: SCOPUS database from inception to June 30, 2025

| **Search number** | **Query** | **Results** |
| --- | --- | --- |
| #1 | ( sepsis ) OR ( TITLE-ABS-KEY ( septicemia* ) ) OR ( TITLE-ABS-KEY ( bloodstream AND infection* ) ) | 709,762 |
| #2 | ( TITLE-ABS-KEY ( presepsin ) OR TITLE-ABS-KEY ( scd14 ) OR TITLE-ABS-KEY ( procalcitonin ) OR TITLE-ABS-KEY ( pct ) ) | 51,526 |
| #3 | ( TITLE-ABS-KEY ( diagnostic ) OR TITLE-ABS-KEY ( accuracy ) OR TITLE-ABS-KEY ( sensitivity ) OR TITLE-ABS-KEY ( specificity ) ) | 8,918,028 |
| #4 | #1 AND #2 AND #3 | 7,764 |
| #5 | Limit #4 to humans, English language, Article | 5,169 |

**Table S3.** The search strategies: Cochrane Library from inception to June 30, 2025

| **Search number** | **Query** | **Results** |
| --- | --- | --- |
| #1 | MeSH descriptor: [Sepsis] explode all trees | 6,562 |
| #2 | Septicemia* | 790 |
| #3 | Bloodstream infection* | 1,765 |
| #4 | #1 OR #2 OR #3 | 8,467 |
| #5 | Presepsin | 49 |
| #6 | sCD14 | 310 |
| #7 | Procalcitonin | 1,710 |
| #8 | PCT | 1,890 |
| #9 | #5 OR #6 OR #7 OR #8 | 3,194 |
| #10 | Diagnostic | 111,005 |
| #11 | Accuracy | 34,465 |
| #12 | Sensitivity | 85,241 |
| #13 | Specificity | 26,104 |
| #14 | #10 OR #11 OR #12 OR #13 | 199,451 |
| #15 | #4 AND #9 AND #14 in Trials | 64 |

**Table S4.** Quality assessment of included studies using QUADAS‑2

| **Study (Year)** | **Risk of Bias** | | | | **Applicability** | | |
| --- | --- | --- | --- | --- | --- | --- | --- |
| **Patient Selection** | **Index Test** | **Reference Standard** | **Flow & Timing** | **Patient Selection** | **Index Test** | **Reference Standard** |
| Selberg O, et al. (2000) | **K** | **L** | **K** | **J** | **J** | **J** | **J** |
| Balci C, et al. (2002) | **J** | **L** | **J** | **J** | **L** | **J** | **J** |
| Gibot S, et al. (2004) | **J** | **L** | **J** | **J** | **J** | **J** | **J** |
| Shozushima T, et al. (2011) | **K** | **L** | **J** | **J** | **J** | **J** | **J** |
| Endo S, et al. (2012) | **L** | **L** | **K** | **J** | **L** | **J** | **L** |
| Liu B, et al. (2013) | **J** | **L** | **J** | **J** | **J** | **J** | **J** |
| Ulla M,et al. (2013) | **J** | **L** | **J** | **K** | **J** | **J** | **J** |
| Vodnik T, et al. (2013) | **J** | **L** | **J** | **J** | **L** | **J** | **J** |
| Wong HR, et al. (2013) | **J** | **L** | **J** | **J** | **L** | **J** | **J** |
| Behnes M, et al. (2014) | **J** | **L** | **J** | **J** | **J** | **J** | **J** |
| Ishigura H, et al. (2014) | **J** | **L** | **J** | **K** | **J** | **J** | **J** |
| Kwoen OJ, et al. (2014) | **J** | **L** | **J** | **J** | **J** | **J** | **J** |
| Madenci OC, et al. (2014) | **J** | **L** | **J** | **J** | **L** | **J** | **J** |
| Nakamura Y, et al. (2014) | **J** | **L** | **J** | **J** | **L** | **L** | **J** |
| Romualdo LGG, et al. (2014) | **J** | **L** | **J** | **J** | **J** | **J** | **J** |
| Carpio R, et al. (2015) | **J** | **L** | **J** | **J** | **J** | **J** | **J** |
| Godnic M, et al. (2015) | **K** | **L** | **K** | **K** | **J** | **J** | **J** |
| Miglietta F, et al. (2015) | **J** | **L** | **J** | **J** | **J** | **J** | **J** |
| Sargentini V, et al. (2015) | **J** | **L** | **J** | **J** | **J** | **J** | **J** |
| Takahashi G, et al. (2015) | **J** | **L** | **J** | **J** | **J** | **J** | **J** |
| Ali FT, et al. (2016) | **K** | **L** | **K** | **J** | **J** | **J** | **J** |
| Bauer PR, et al. (2016) | **J** | **L** | **J** | **J** | **J** | **J** | **J** |
| Brenner T, et al. (2016) | **J** | **L** | **J** | **J** | **L** | **J** | **J** |
| Enguix-Armada A, et al. (2016) | **J** | **L** | **K** | **L** | **J** | **J** | **J** |
| Klouche K, et al. (2016) | **L** | **L** | **J** | **J** | **J** | **J** | **J** |
| Leli C, et al. (2016) | **J** | **L** | **K** | **J** | **J** | **J** | **J** |
| van der Geest PJ, et al. (2016) | **J** | **L** | **J** | **J** | **J** | **J** | **J** |
| Yang Y, et al. (2016) | **J** | **L** | **K** | **J** | **J** | **J** | **J** |
| Romualdo LGG, et al. (2017) | **J** | **L** | **K** | **K** | **J** | **J** | **J** |
| Iskandar A, et al. (2018) | **J** | **L** | **J** | **J** | **J** | **J** | **J** |
| Contenti J, et al. (2019) | **J** | **L** | **J** | **J** | **J** | **J** | **J** |
| Venugopalan DP, et al. (2019) | **J** | **L** | **J** | **J** | **J** | **J** | **J** |
| Bösch F, et al. (2020) | **J** | **L** | **J** | **J** | **J** | **J** | **J** |
| Sakyi SA, et al. (2020) | **J** | **L** | **J** | **J** | **J** | **J** | **J** |
| Lee S, et al. (2022) | **J** | **L** | **J** | **J** | **J** | **J** | **J** |
| Juneja D, et al. (2023) | **J** | **L** | **K** | **J** | **J** | **J** | **J** |
| Roy S, et al. (2023) | **J** | **L** | **J** | **J** | **J** | **J** | **J** |
| Hincu MA, et al. (2025) | **J** | **L** | **J** | **J** | **J** | **J** | **J** |

J = Low, L = High, **K** = Unclear

**Table S5.** Sensitivity analysis by leave-one-out method for sensitivity and specificity of procalcitonin

| **Study omitted** | **Year** | **Pooled sensitivity (95% CI)** | **Pooled specificity (95% CI)** |
| --- | --- | --- | --- |
| Selberg O, et al. | 2000 | 0.78 (0.74-0.81) | 0.78 (0.72-0.83) |
| Balci C, et al. | 2002 | 0.78 (0.74-0.81) | 0.77 (0.71-0.82) |
| Gibot S, et al. | 2004 | 0.78 (0.74-0.81) | 0.78 (0.71-0.83) |
| Endo S, et al. | 2012 | 0.78 (0.74-0.81) | 0.77 (0.71-0.83) |
| Wong HR, et al. | 2013 | 0.78 (0.74-0.81) | 0.78 (0.72-0.83) |
| Liu B, et al. | 2013 | 0.79 (0.75-0.82) | 0.77 (0.71-0.82) |
| Vodnik T, et al. | 2013 | 0.78 (0.74-0.81) | 0.76 (0.70-0.81) |
| Ulla M,et al. | 2013 | 0.78 (0.74-0.81) | 0.77 (0.71-0.83) |
| Brenner T, et al. | 2014 | 0.78 (0.74-0.82) | 0.77 (0.71-0.82) |
| Madenci OC, et al. | 2014 | 0.78 (0.74-0.82) | 0.77 (0.71-0.82) |
| Romualdo LGG, et al. | 2014 | 0.78 (0.74-0.82) | 0.78 (0.72-0.83) |
| Kwoen OJ, et al. | 2014 | 0.78 (0.74-0.81) | 0.77 (0.71-0.82) |
| Godnic M, et al. | 2015 | 0.79 (0.75-0.82) | 0.78 (0.71-0.83) |
| Miglietta F, et al. | 2015 | 0.78 (0.74-0.81) | 0.77 (0.71-0.82) |
| Sargentini V, et al. | 2015 | 0.78 (0.74-0.81) | 0.77 (0.71-0.83) |
| Takahashi G, et al. | 2015 | 0.78 (0.74-0.82) | 0.77 (0.71-0.83) |
| Ali FT, et al. | 2016 | 0.78 (0.75-0.82) | 0.77 (0.71-0.82) |
| Bauer PR, et al. | 2016 | 0.78 (0.74-0.82) | 0.77 (0.71-0.83) |
| Enguix-Armada A, et al. | 2016 | 0.77 (0.74-0.81) | 0.76 (0.70-0.81) |
| Leli C, et al. | 2016 | 0.78 (0.74-0.81) | 0.77 (0.71-0.82) |
| van der Geest PJ, et al. | 2016 | 0.78 (0.75-0.82) | 0.78 (0.71-0.83) |
| Yang Y, et al. | 2016 | 0.78 (0.74-0.81) | 0.78 (0.72-0.83) |
| Klouche K, et al. | 2016 | 0.78 (0.74-0.81) | 0.78 (0.72-0.83) |
| Romualdo LGG, et al. | 2017 | 0.78 (0.74-0.82) | 0.77 (0.71-0.82) |
| Iskandar A, et al. | 2019 | 0.78 (0.74-0.82) | 0.78 (0.72-0.83) |
| Sakyi SA, et al. | 2020 | 0.78 (0.75-0.82) | 0.77 (0.71-0.82) |
| Lee S, et al. | 2022 | 0.78 (0.74-0.82) | 0.76 (0.70-0.82) |
| Contenti J, et al. | 2019 | 0.78 (0.74-0.82) | 0.78 (0.72-0.83) |
| Venugopalan DP, et al. | 2019 | 0.79 (0.75-0.82) | 0.78 (0.73-0.83) |
| Hincu MA, et al. | 2025 | 0.78 (0.74-0.82) | 0.77 (0.71-0.82) |
| Roy S, et al. | 2023 | 0.78 (0.74-0.82) | 0.78 (0.72-0.83) |
| Juneja D, et al. | 2023 | 0.78 (0.74-0.81) | 0.78 (0.72-0.83) |
| Bösch F, et al. | 2020 | 0.78 (0.74-0.82) | 0.77 (0.71-0.83) |
| **Combined** | | **0.78 (0.74-0.81)** | **0.77 (0.71-0.82)** |

**Table S6.** Sensitivity analysis by leave-one-out method for sensitivity and specificity of presepsin

| **Study omitted** | **Year** | **Pooled sensitivity (95% CI)** | **Pooled specificity (95% CI)** |
| --- | --- | --- | --- |
| Shozushima T, et al. | 2011 | 0.82 (0.76-0.86) | 0.78 (0.72-0.83) |
| Endo S, et al. | 2012 | 0.81 (0.76-0.85) | 0.78 (0.72-0.83) |
| Liu B, et al. | 2013 | 0.82 (0.77-0.86) | 0.78 (0.72-0.83) |
| Vodnik T, et al. | 2013 | 0.81 (0.76-0.85) | 0.77 (0.72-0.82) |
| Ulla M,et al. | 2013 | 0.82 (0.77-0.86) | 0.79 (0.73-0.83) |
| Brenner T, et al. | 2014 | 0.81 (0.76-0.85) | 0.78 (0.73-0.83) |
| Behnes M, et al. | 2014 | 0.81 (0.76-0.85) | 0.79 (0.73-0.83) |
| Madenci OC, et al. | 2014 | 0.82 (0.77-0.86) | 0.78 (0.73-0.83) |
| Romualdo LGG, et al. | 2014 | 0.82 (0.76-0.86) | 0.79 (0.73-0.83) |
| Ishigura H, et al. | 2014 | 0.81 (0.76-0.85) | 0.78 (0.72-0.83) |
| Kwoen OJ, et al. | 2014 | 0.81 (0.76-0.86) | 0.78 (0.72-0.83) |
| Nakamura Y, et al. | 2014 | 0.82 (0.77-0.86) | 0.78 (0.72-0.83) |
| Godnic M, et al. | 2015 | 0.81 (0.76-0.86) | 0.78 (0.73-0.83) |
| Sargentini V, et al. | 2015 | 0.81 (0.76-0.86) | 0.78 (0.73-0.83) |
| Takahashi G, et al. | 2015 | 0.82 (0.76-0.86) | 0.78 (0.72-0.83) |
| Carpio R, et al. | 2015 | 0.82 (0.76-0.86) | 0.78 (0.72-0.83) |
| Ali FT, et al. | 2016 | 0.82 (0.77-0.86) | 0.78 (0.72-0.83) |
| Enguix-Armada A, et al. | 2016 | 0.81 (0.76-0.86) | 0.77 (0.71-0.81) |
| Leli C, et al. | 2016 | 0.81 (0.76-0.85) | 0.78 (0.73-0.83) |
| Klouche K, et al. | 2016 | 0.81 (0.76-0.85) | 0.79 (0.73-0.83) |
| Romualdo LGG, et al. | 2017 | 0.82 (0.78-0.86) | 0.78 (0.72-0.82) |
| Iskandar A, et al. | 2019 | 0.81 (0.76-0.86) | 0.78 (0.73-0.83) |
| Sakyi SA, et al. | 2020 | 0.82 (0.77-0.86) | 0.78 (0.72-0.83) |
| Lee S, et al. | 2022 | 0.82 (0.77-0.86) | 0.77 (0.72-0.82) |
| Contenti J, et al. | 2019 | 0.82 (0.77-0.86) | 0.79 (0.73-0.83) |
| Venugopalan DP, et al. | 2019 | 0.82 (0.78-0.86) | 0.77 (0.72-0.82) |
| Hincu MA, et al. | 2025 | 0.80 (0.76-0.84) | 0.79 (0.73-0.83) |
| Roy S, et al. | 2023 | 0.82 (0.77-0.86) | 0.79 (0.73-0.83) |
| Juneja D, et al. | 2023 | 0.82 (0.77-0.86) | 0.79 (0.73-0.83) |
| Bösch F, et al. | 2020 | 0.82 (0.77-0.86) | 0.78 (0.72-0.83) |
| **Combined** | | **0.82 (0.77-0.86)** | **0.78 (0.73-0.83)** |

**Table S7.** Sensitivity analysis by restricting the dataset to studies with a low risk of bias in all domains except the index test.

| **Performance index** | **Analysis type** | **N** | **Pooled sensitivity**  **(95% CI)** | **Pooled specificity**  **(95% CI)** | **P value for difference in sensitivity** | **P value for difference in**  **specificity** |
| --- | --- | --- | --- | --- | --- | --- |
| PCT | Main analysis  (all studies) | 33 | 0.78  (0.74-0.81) | 0.77  (0.71-0.82) |  |  |
|  | Studies with low risk of bias | 17 | 0.73  (0.68-0.77) | 0.75  (0.67-0.81) | 0.086 | 0.660 |
| P-SEP | Main analysis  (all studies) | 30 | 0.82  (0.77-0.86) | 0.78  (0.73-0.83) |  |  |
|  | Studies with low risk of bias | 15 | 0.80  (0.73-0.86) | 0.77  (0.69-0.83) | 0.620 | 0.820 |

**Abbreviations:** CI=confidence interval; PCT=procalcitonin; P-SEP=presepsin
